# Supplementary figures and images for: SMYD3 Modulates the HGF/MET Signaling Pathway in Gastric Cancer
Source: MDPI journal article supplement (doi:10.3390/cells12202481), 2023-10-18

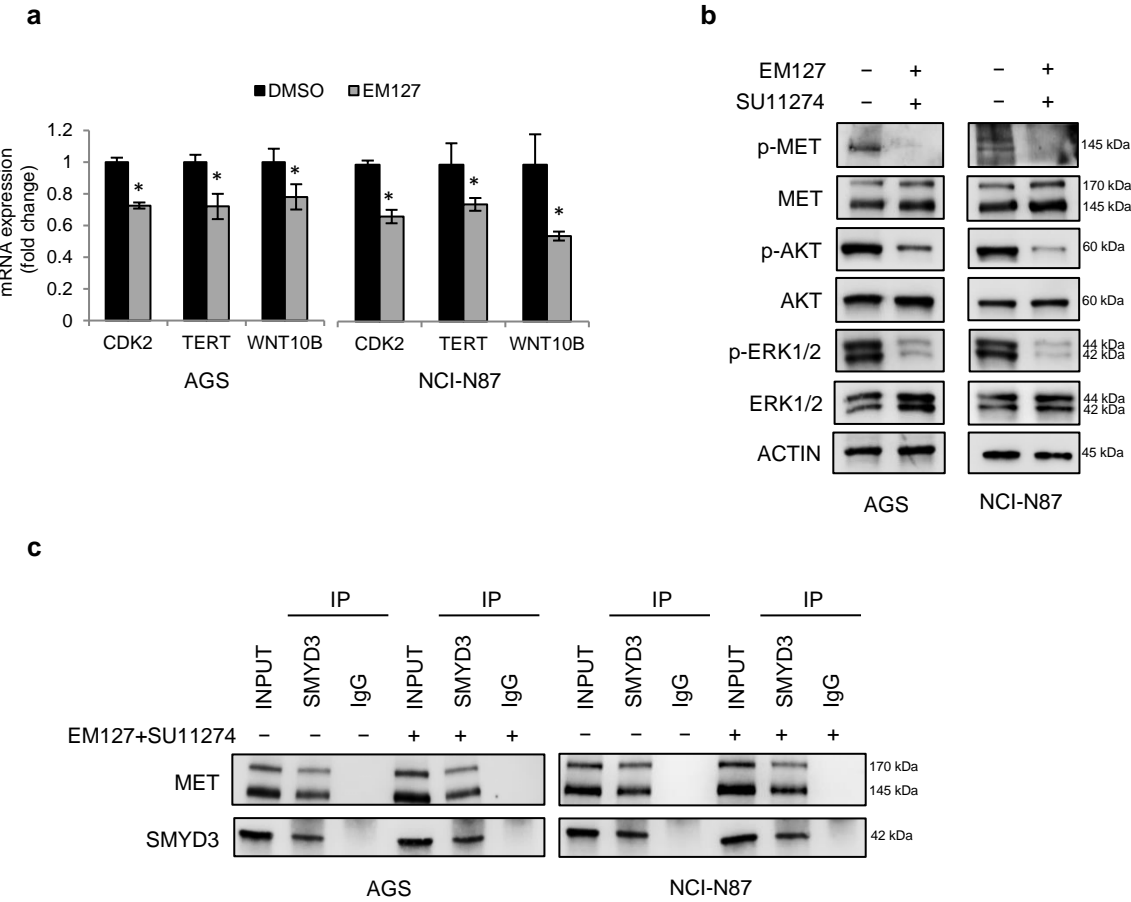

# Supplementary Figure S2

**a**

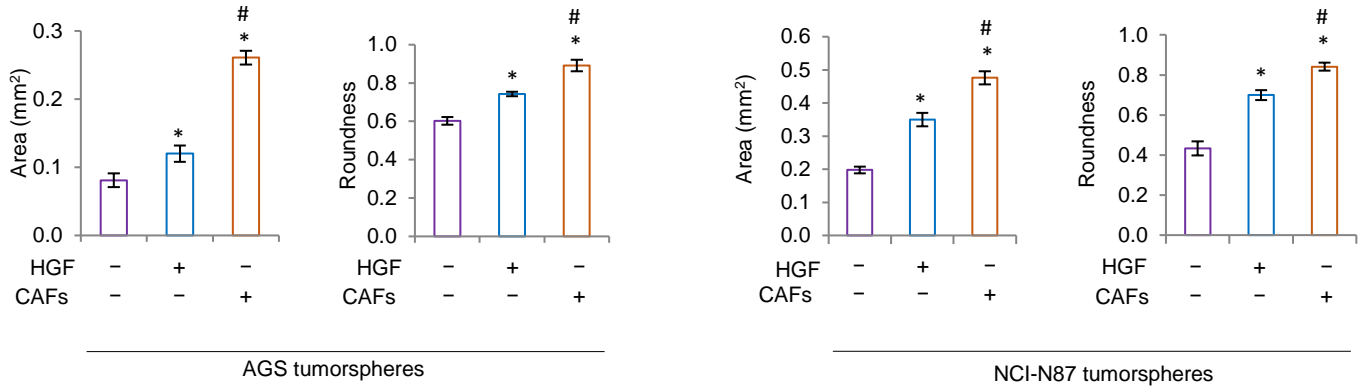

**b**

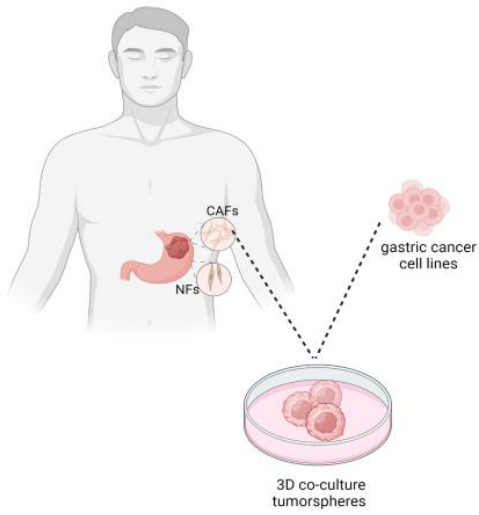

**c**

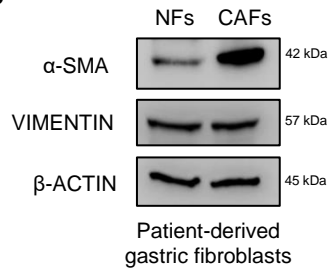

**d**

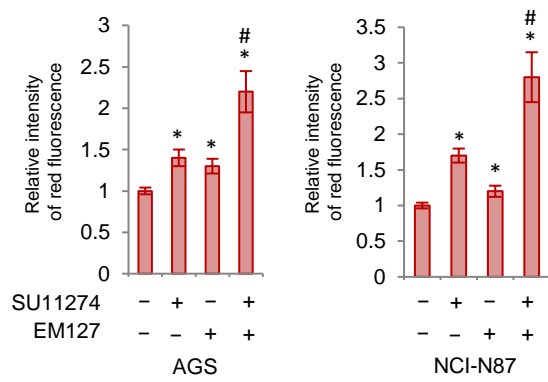

Supplement: s1 [file s1]
